# Supplementary material for: Electrosprayed TiO2nanoporous hemispheres for enhanced electron transport and device performance of formamidinium based perovskite solar cells
Source: Royal Society of Chemistry journal article supplement (doi:10.1039/c6nr07369g), 2016-11-30
Supplement: c6nr07369g1.pdf [file c6nr07369g1.pdf]

## Electronic supplementary information (ESI)

### Electrosprayed TiO<sub>2</sub> Nanoporous Hemi-spheres for Enhanced Electron Transport and Device Performance of Formamidinium Based Perovskite Solar Cells

Tao Ye<sup>a,b†</sup>, Shaoyang Ma<sup>c†</sup>, Xi Jiang<sup>d</sup>, Miloš Petrović<sup>a,b</sup>, Chellappan Vijila<sup>b\*</sup>, Seeram Ramakrishna<sup>a,b\*</sup>, Lei Wei<sup>c\*</sup>

<sup>a</sup>Department of Mechanical Engineering, National University of Singapore, Singapore 117576, Singapore.

<sup>b</sup>Institute of Materials Research and Engineering (IMRE), Agency for Science, Technology and Research (A\*STAR), #08-03, 2 Fusionopolis Way, Innovis, 138634, Singapore.

<sup>c</sup>School of Electrical and Electronic Engineering, Nanyang Technological University, Singapore 639798, Singapore.

<sup>d</sup>Department of Chemical and Biomolecular Engineering, National University of Singapore, Singapore 117585, Singapore.

<sup>†</sup>These authors contributed equally to this work.

\*Corresponding authors: c-vijila@imre.a-star.edu.sg, seeram@nus.edu.sg, wei.lei@ntu.edu.sg

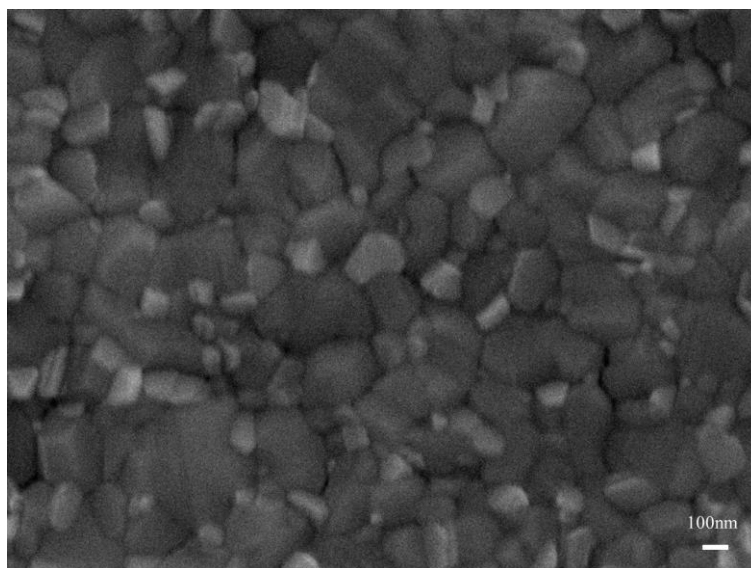

**Fig. S1.** SEM image of prepared  $\text{FA}_{0.81}\text{MA}_{0.15}\text{Pb}(\text{I}_{0.836}\text{Br}_{0.15})_3$  film on top of  $\text{TiO}_2$  NPs layer.

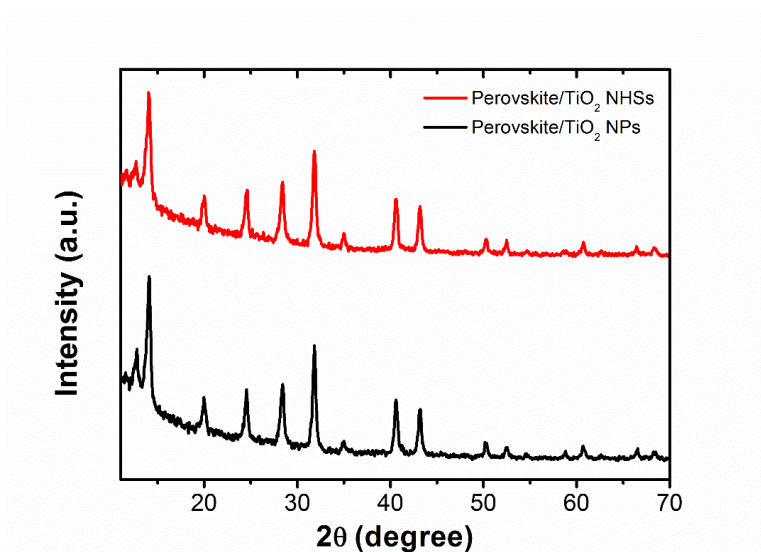

**Fig. S2.** XRD results of the fabricated  $\text{FA}_{0.81}\text{MA}_{0.15}\text{Pb}(\text{I}_{0.836}\text{Br}_{0.15})_3$  films on top of  $\text{TiO}_2$  NHSs and NPs layers, respectively.

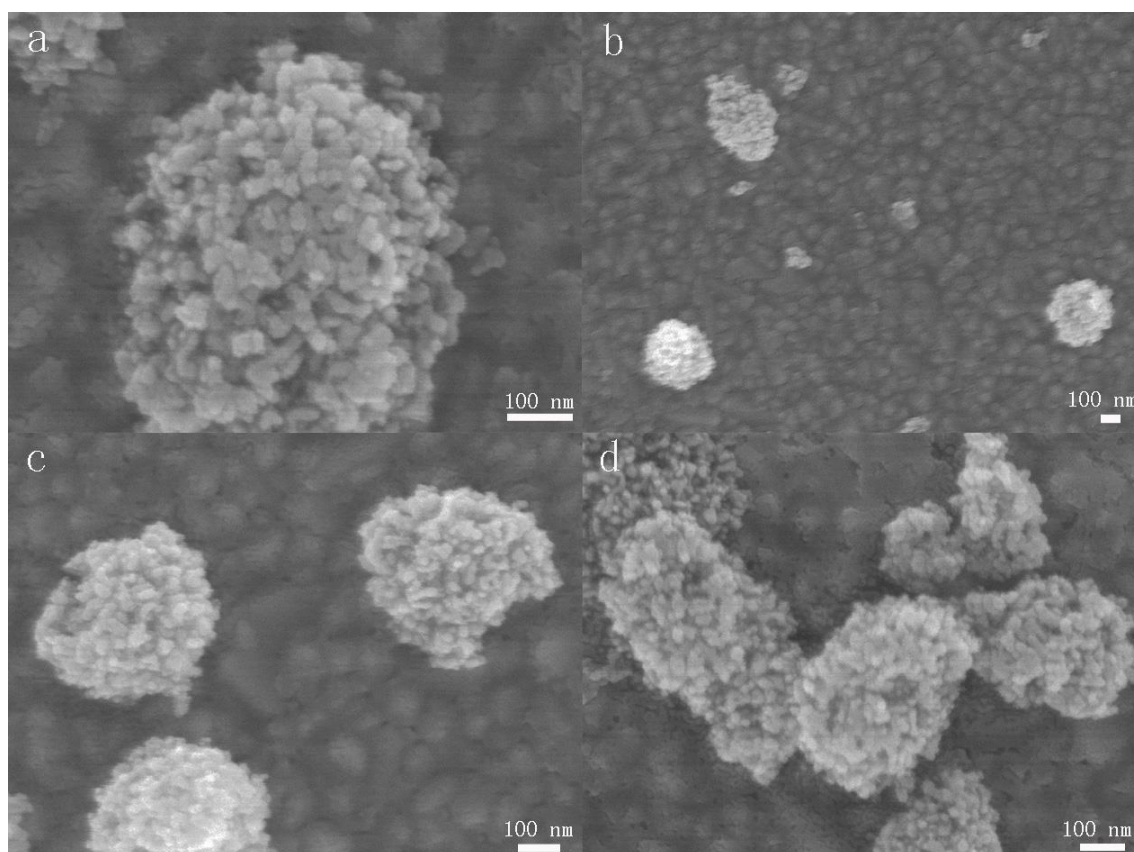

**Fig. S3.** SEM images of the prepared TiO<sub>2</sub> NHSs. a) shows the nanoporous structure for the prepared NHS; b) shows the TiO<sub>2</sub> NHSs layer with 30 s collecting time, c) shows the TiO<sub>2</sub> NHSs layer with 60 s collecting time and d) shows the TiO<sub>2</sub> NHSs layer with 90 s collecting time. TiO<sub>2</sub> NHSs pile up with the 90 s collecting time.

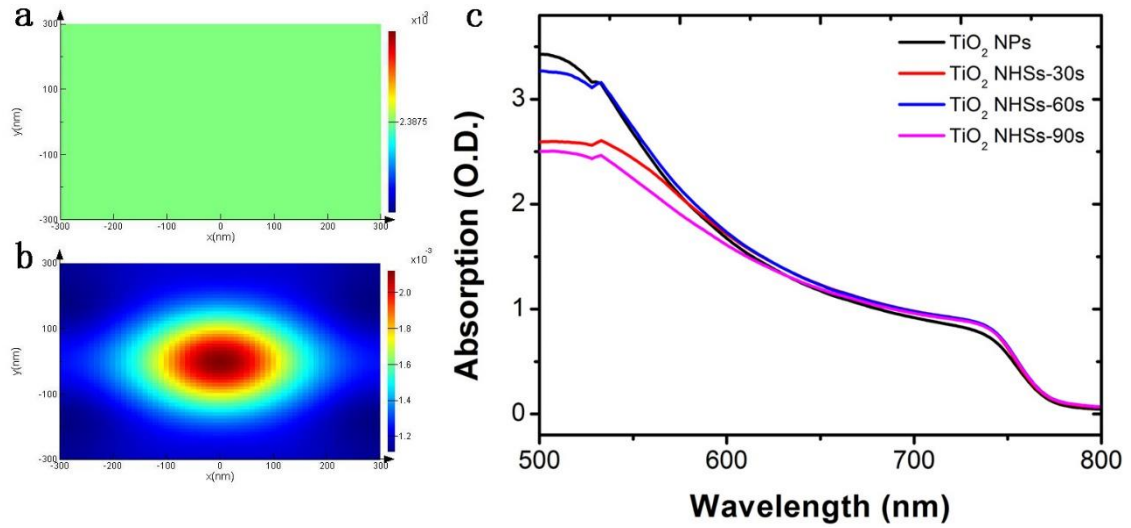

**Fig. S4.** The simulated optical power distribution at TiO<sub>2</sub>/perovskite interface of a) FTO/C-TiO<sub>2</sub>/Meso-TiO<sub>2</sub> NPs/perovskite and b) FTO/C-TiO<sub>2</sub>/TiO<sub>2</sub> NHS-60 s/perovskite samples; c) the absorption spectra of the FTO/C-TiO<sub>2</sub>/Meso-TiO<sub>2</sub>/perovskite samples based on TiO<sub>2</sub> NPs and TiO<sub>2</sub> NHSs with different collecting times (30 s, 60 s and 90 s). The FDTD model were set as follows, for a): radius of TiO<sub>2</sub> NHS was 200 nm, distance between two adjacent TiO<sub>2</sub> NHSs centres was 600 nm, and thickness of TiO<sub>2</sub> NHS-60 s/perovskite layer was 600 nm; and for b): thickness of meso-TiO<sub>2</sub> NPs layer was 200 nm and thickness of perovskite layer was 600 nm, and both input light wavelengths were 700 nm.

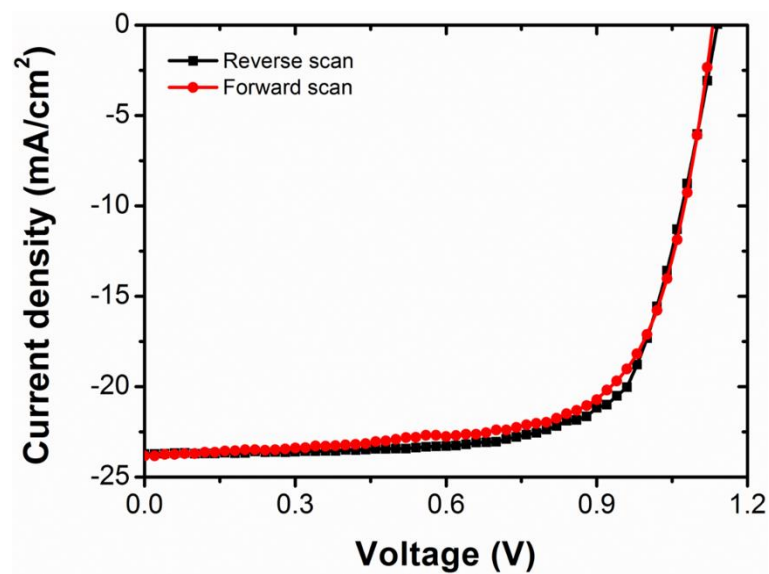

**Fig. S5.** *J-V* characteristics of the PSC based on TiO<sub>2</sub> NHSs measured under simulated 1 sun condition with forward and backward scans. As for the reverse scan:  $J_{sc}$ : 23.8 mA/cm<sup>2</sup>;  $V_{oc}$ : 1.14 V;  $FF$ : 0.72 and PCE of 19.6%. Little hysteresis can be seen in this kind of device.

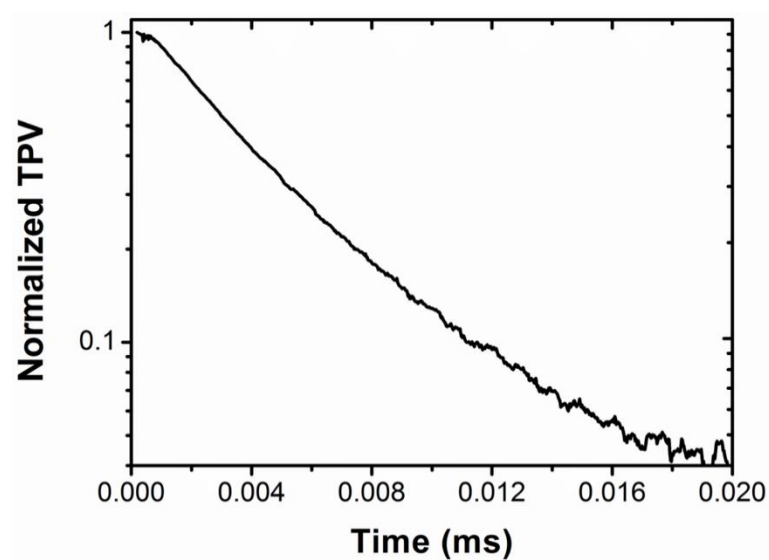

**Fig. S6.** TPV result of the control group device (based on TiO<sub>2</sub> NPs). The TPV lifetime is just 4  $\mu$ s when the back level is 1 V.

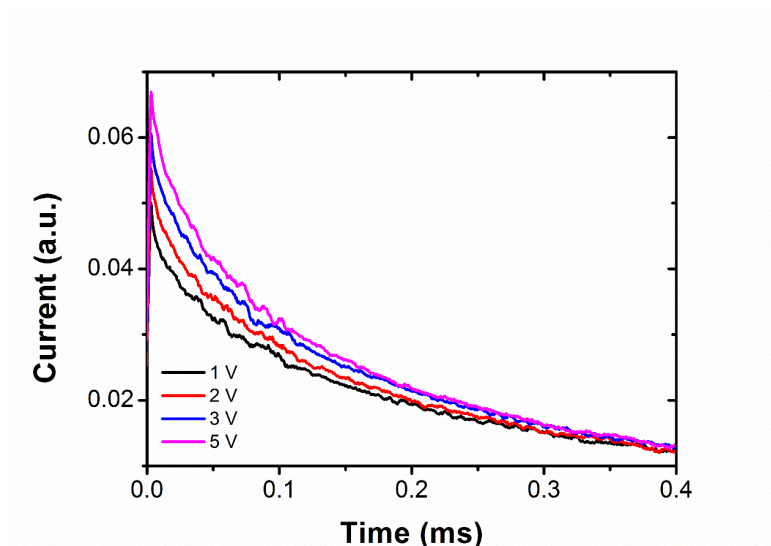

**Fig. S7.** TOF result of the TiO<sub>2</sub> NHSs device with different positive background voltages.

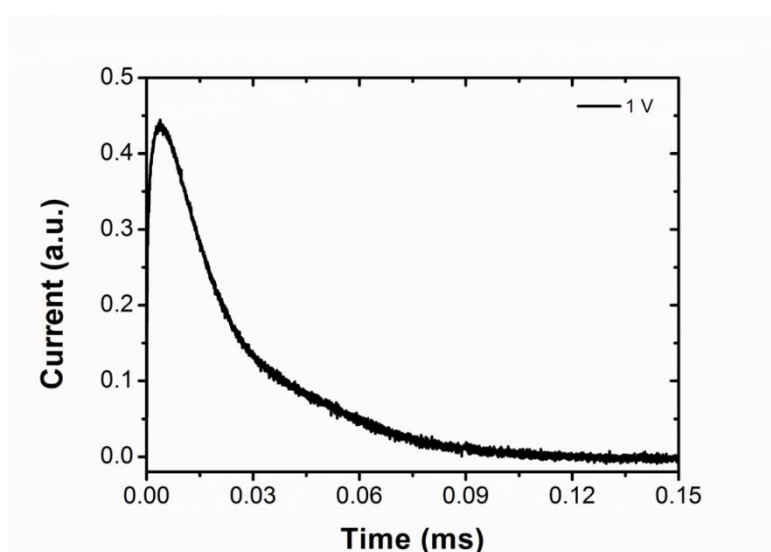

**Fig. S8.** TOF result of the control group device (based on TiO<sub>2</sub> NPs) with positive 1 V background voltage. Hole mobility of  $1.0 \times 10^{-3} \text{ cm}^2 \text{ V}^{-1} \text{ s}^{-1}$  is obtained for the control group device (the thickness of the perovskite/HTM heterojunction is 650 nm).

**Table S1.** Photovoltaic parameters for the stability of perovskite solar cell measured under simulated 1 sun (solar cell was encapsulated and stored in a dessicator).

|           | $V_{oc}$ (V) | $J_{sc}$ (mA/cm <sup>2</sup> ) | $FF$ | PCE (%) |
|-----------|--------------|--------------------------------|------|---------|
| Initially | 1.14         | 23.8                           | 0.71 | 19.3    |
| 10 days   | 1.15         | 23.9                           | 0.71 | 19.6    |
| 20 days   | 1.14         | 23.7                           | 0.70 | 19.1    |
| 60 days   | 1.13         | 23.6                           | 0.69 | 18.6    |

**Table S2.** The lifetime versus voltage parameters extracted from TPV experiment with an error range of  $\pm 2\%$ .

| Back (mV)           | 200 | 400 | 500 | 800 |
|---------------------|-----|-----|-----|-----|
| Lifetime ( $\mu$ s) | 174 | 164 | 115 | 102 |
